# Supplementary material for: Discovery of New Chemical Tools against Leishmania amazonensis via the MMV Pathogen Box
Source: MDPI journal article supplement (doi:10.3390/ph14121219), 2021-11-24
Supplement: s1 [file s1]

**Table S1.** Molecular information of the 57 compounds that presents leishmanicidal activity.

| MMV Identifier | Inhibitor | % of inhibition <sup>a</sup> | Mol. structure                                                                      | MMV Identifier | Inhibitor | % of inhibition <sup>a</sup> | Mol. structure                                                                       |
|----------------|-----------|------------------------------|-------------------------------------------------------------------------------------|----------------|-----------|------------------------------|--------------------------------------------------------------------------------------|
| MMV689758      | R         | 90                           | 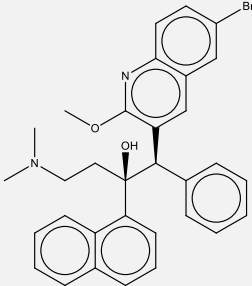  | MMV1030799     | M         | 91                           |   |
| MMV676412      | T         | 93                           |   | MMV690102      | K         | 89                           |   |
| MMV676401      | T         | 84                           |  | MMV688179      | K         | 86                           |  |

MMV676477

T

92

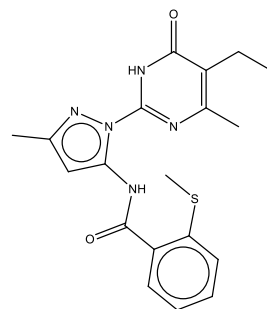

MMV688262

T

86

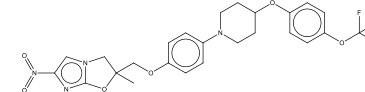

MMV661713

T

84

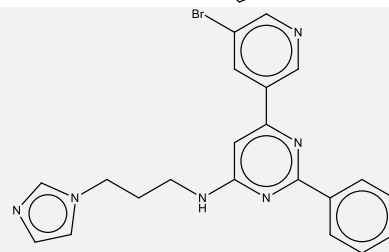

MMV687807

T

90

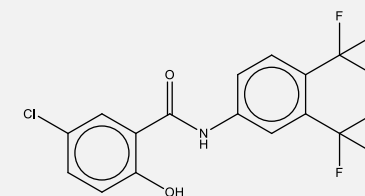

MMV676383

T

83

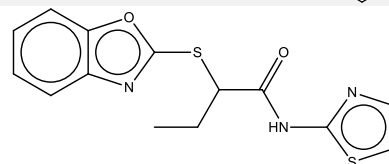

MMV021660

T

87

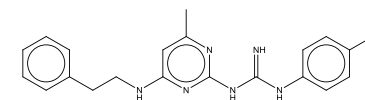

MMV676388

T

91

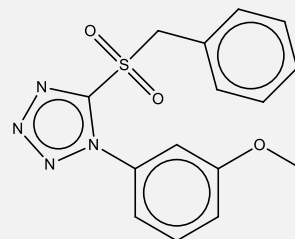

MMV688417

X

87

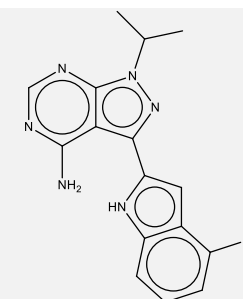

MMV688936

T

90

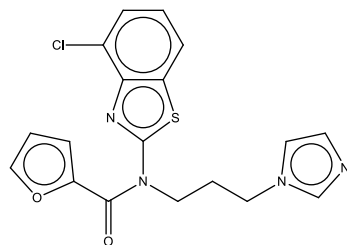

MMV687273

T

89

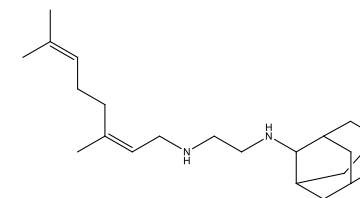

MMV676509

T

80

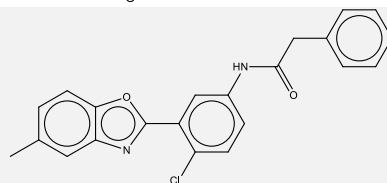

MMV1088520

M

89

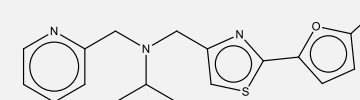

MMV461553

T

88

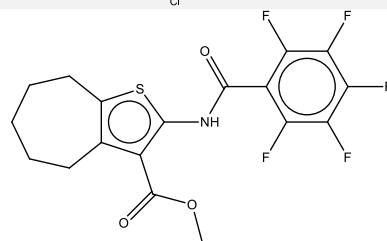

MMV688844

T

80

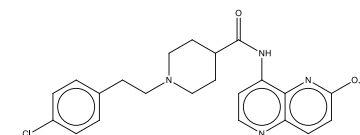

MMV000062

R

89

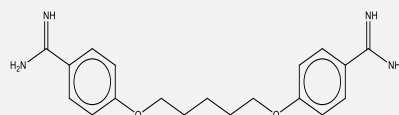

MMV689437

K

89

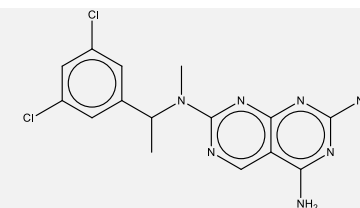

MMV011903

M

86

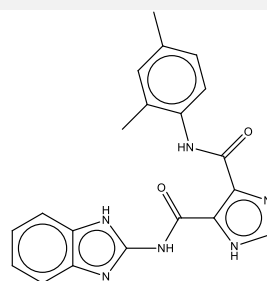

MMV022029

M

91

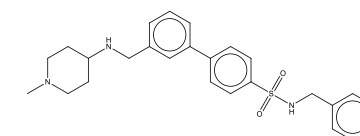

MMV688761

S

88

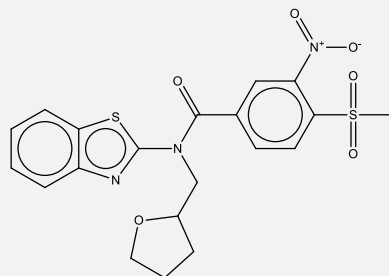

MMV024114

M

92

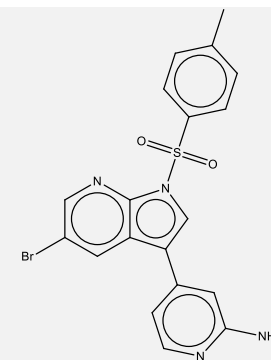

MMV676604

K

66

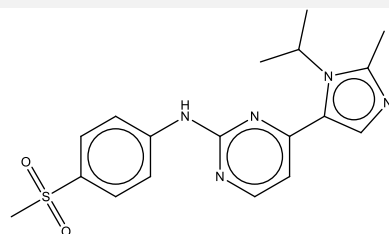

MMV024406

M

92

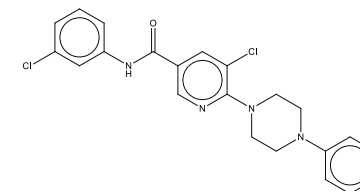

MMV687776

L

52

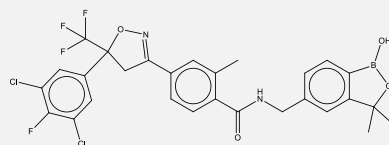

MMV659004

K

87

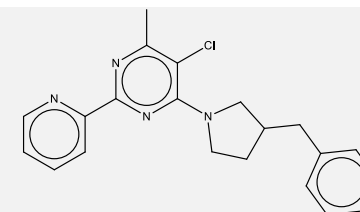

MMV687800

R

88

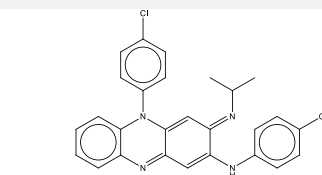

MMV687812

T

91

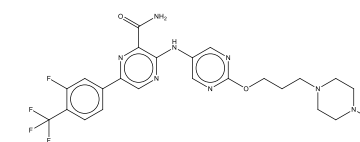

MMV676605

M

53

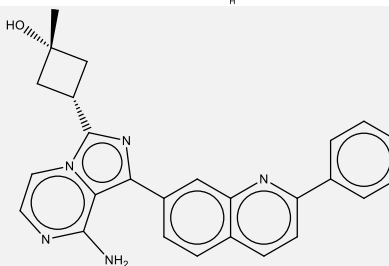

MMV688372

K

87

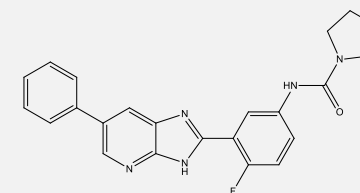



MMV006901

M

85

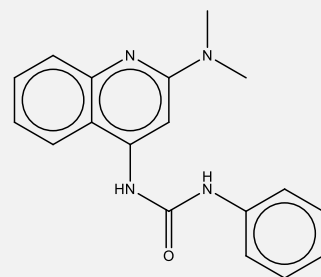

MMV153413

T

86

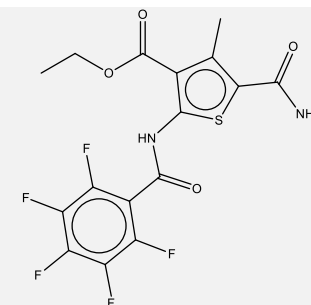

MMV687730

T

87

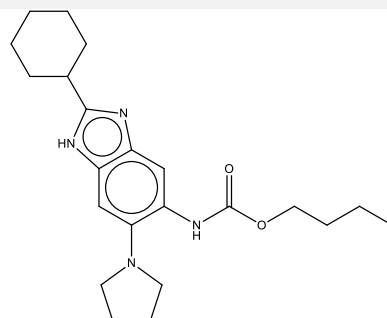

MMV272144

T

89

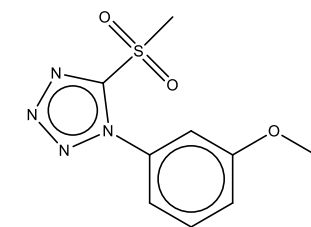

MMV688371

K

89

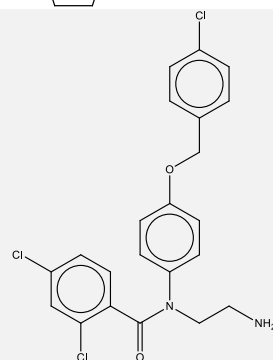

MMV021013

T

90

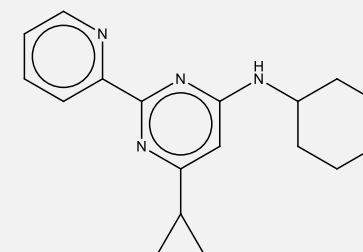

MMV688283

K

85

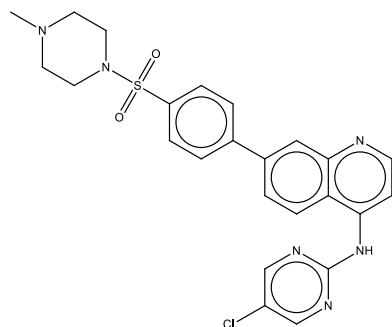

MMV688754

K

76

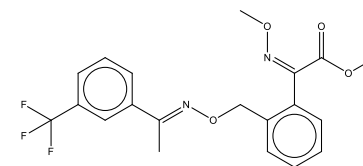

MMV687703

T

85

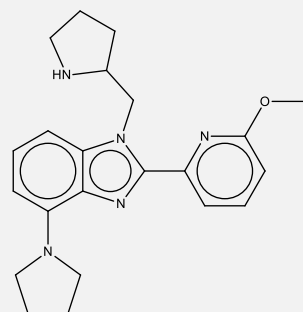

MMV688978

R

90

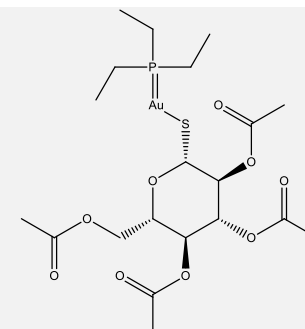

MMV687251

T

91

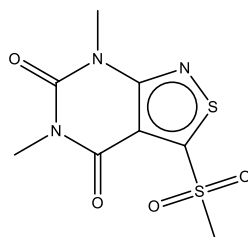

MMV688273

K

79

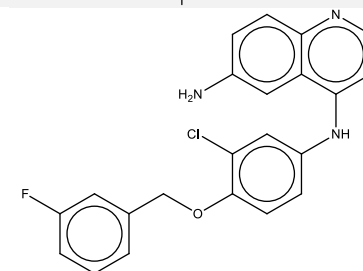

MMV690103

K

90

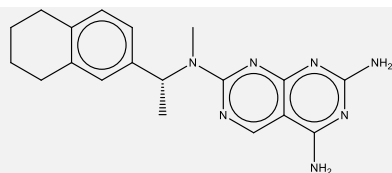

R: Reference compound; T: Tuberculosis; M: Malaria; K: Kinetoplastid; X: Toxoplasmosis; C: Cryptosporidiosis; O: Onchocerciasis; S: Schistosomiasis; L: Lymphatic filariasis; H: Hook-worm Trichuriasis. \*% of inhibition at 10  $\mu$ M (against *L. amazonensis* promastigotes)

Comp.  
1

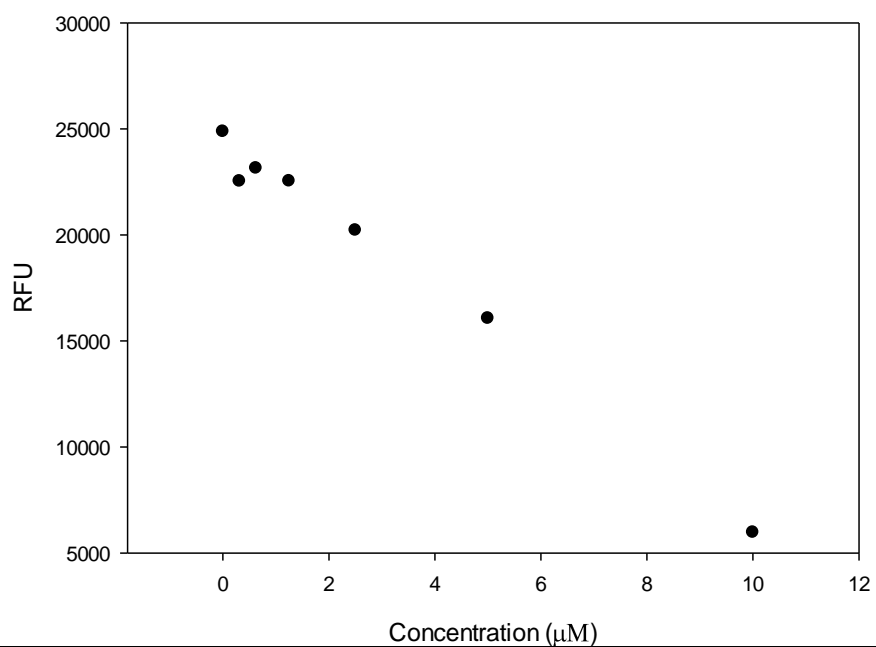

Comp.  
2

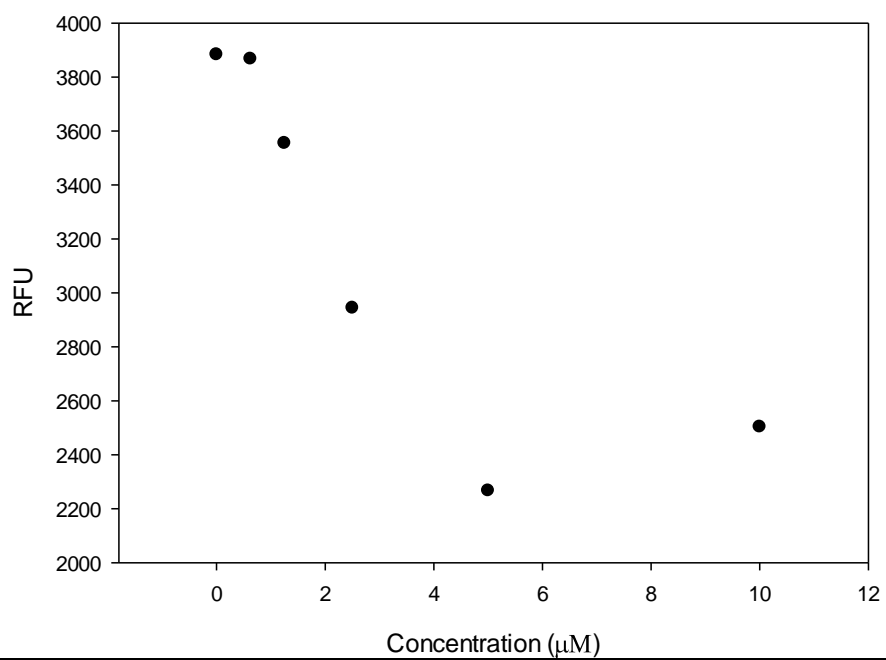



Comp.  
3

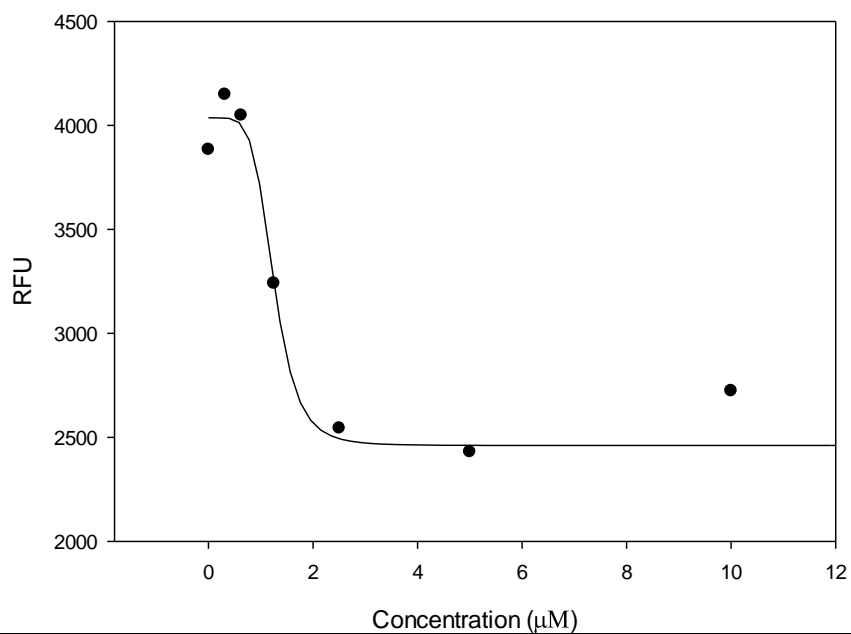

Comp.  
4

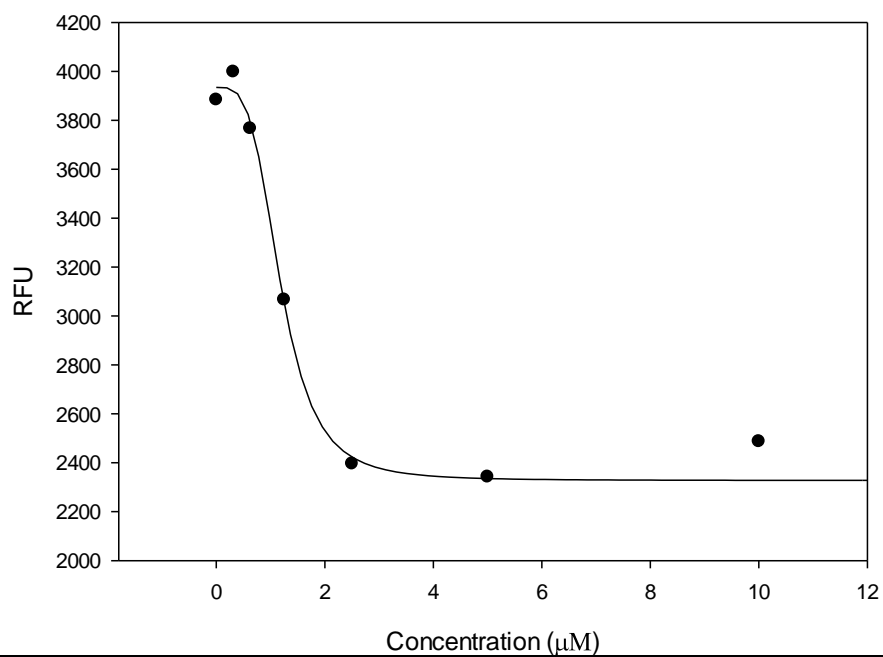

Comp.  
5

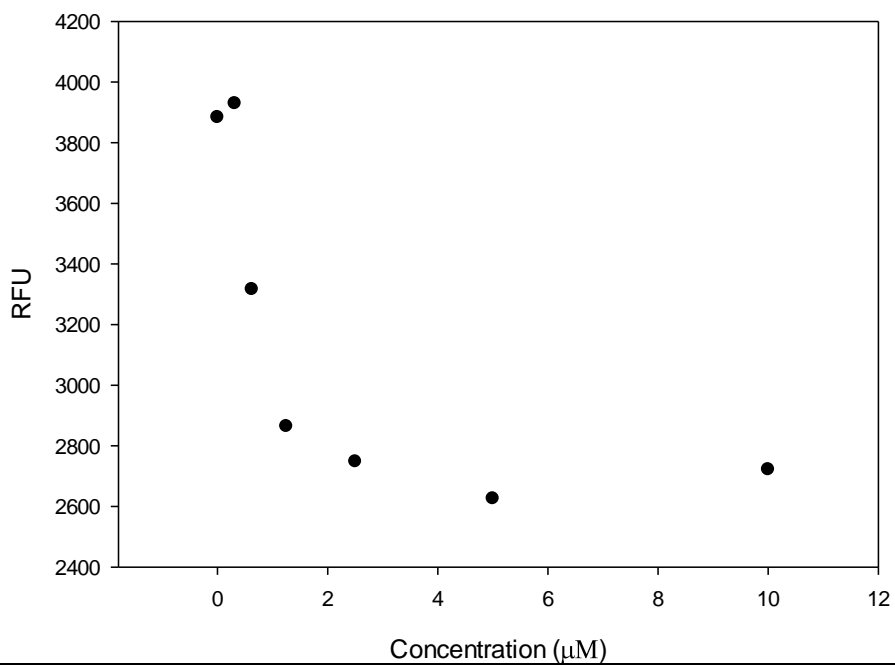

Comp.  
6

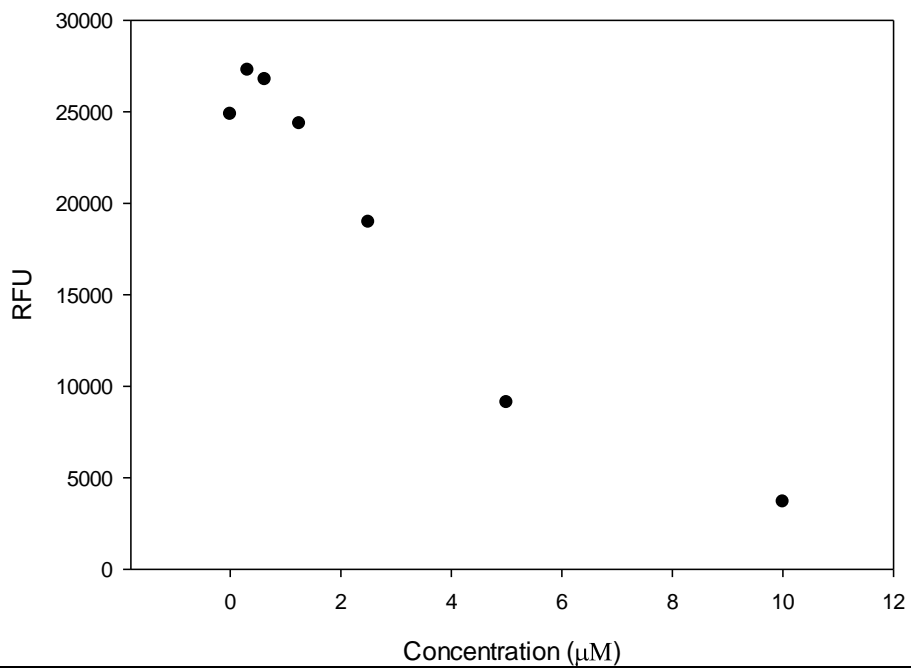

Comp.  
7

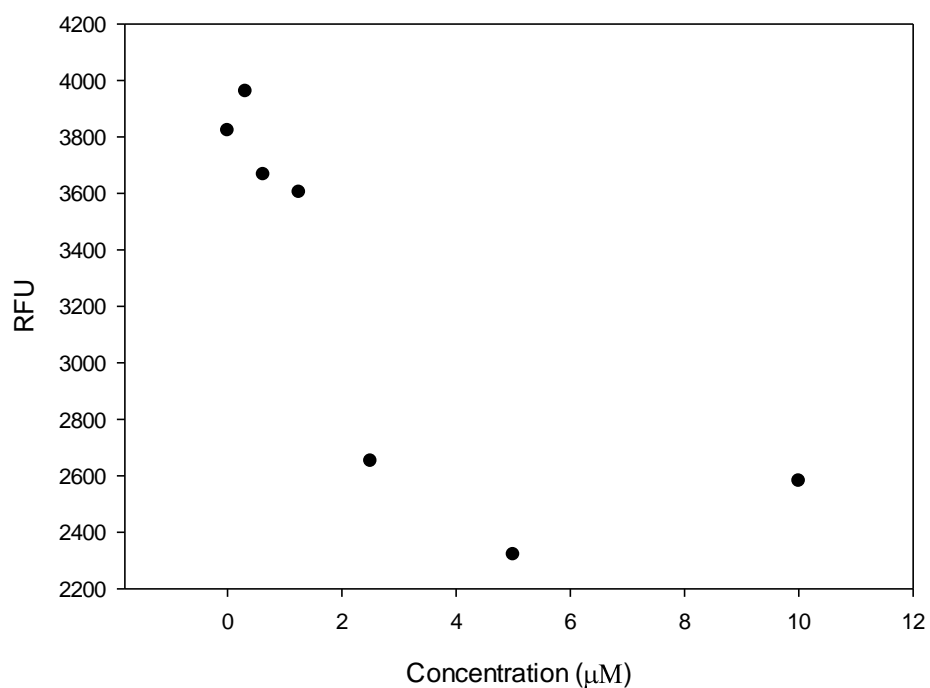

Comp.  
8

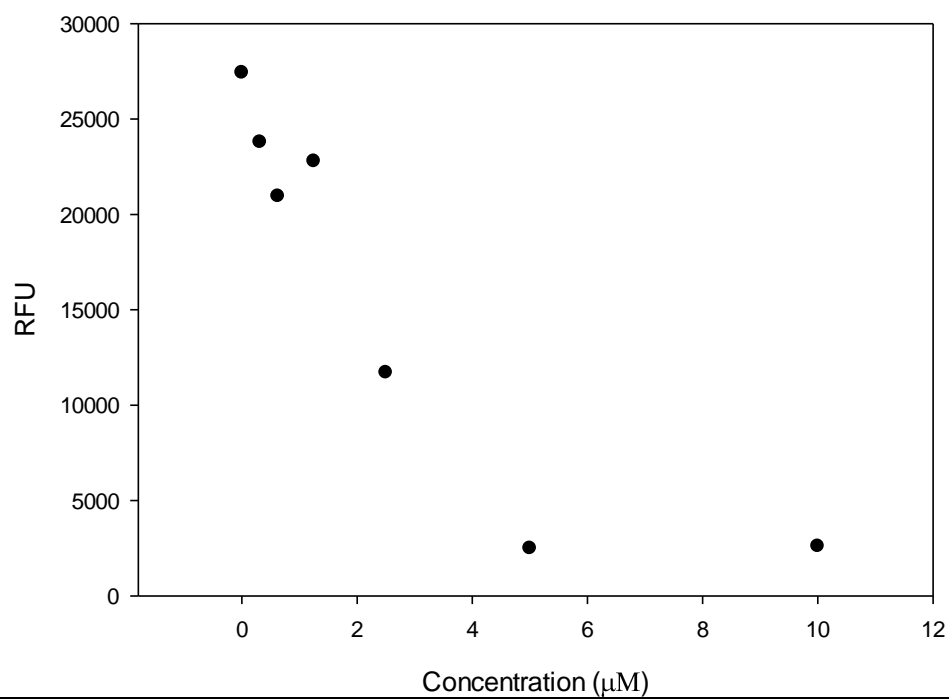

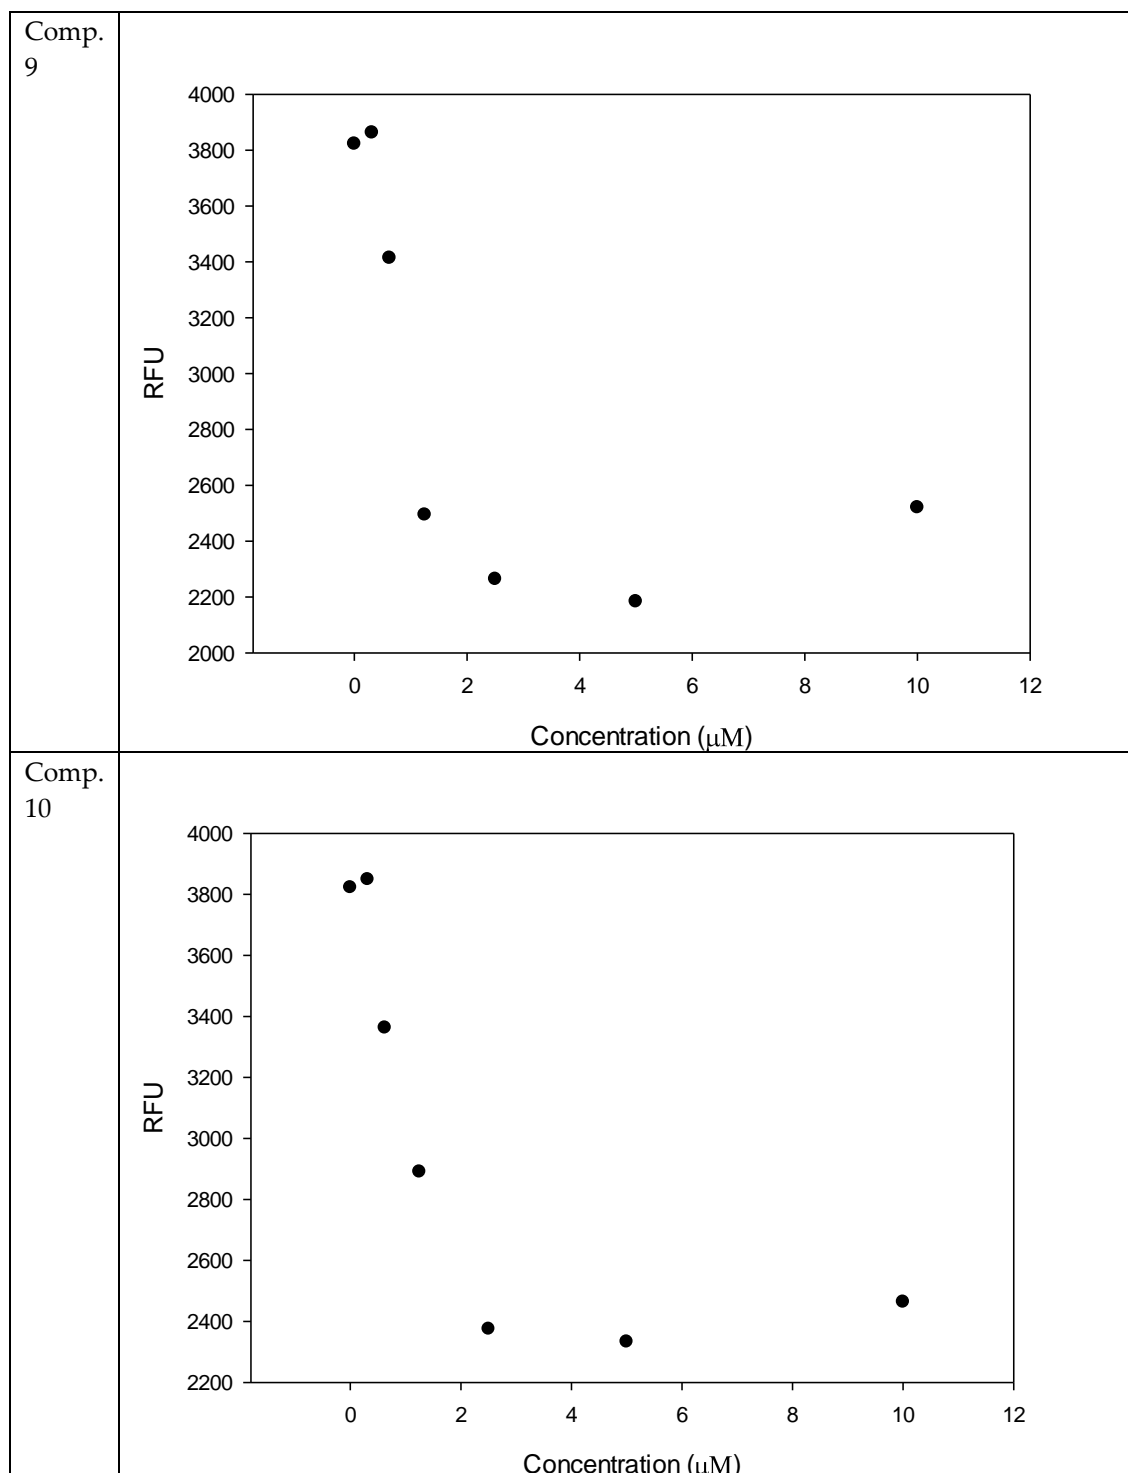

**Scheme S1.** Concentration-dependent curves for the IC<sub>50</sub> values of the 10 active compounds.

**Table S2.** Information about the Order and batch of the Pathogen Box plates. MMV- Pathogen Box - Order 1660792 (<https://www.mmv.org/mmv-open/pathogen-box/pathogen-box-supporting-information>, access date 15 May 2021).

| <b>Plate</b> | <b>Batch</b> |
|--------------|--------------|
| Plate A      | BFD0014581   |
| Plate B      | BFD0014681   |
| Plate C      | BFD0014781   |
| Plate D      | BFD0014881   |
| Plate E      | BFD0014981   |

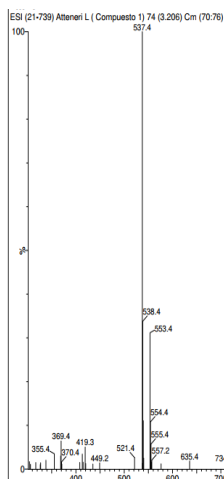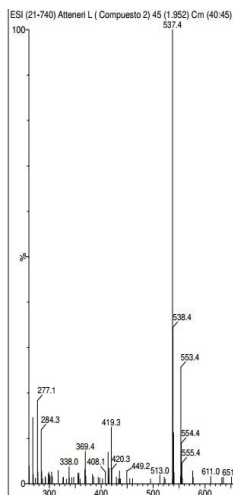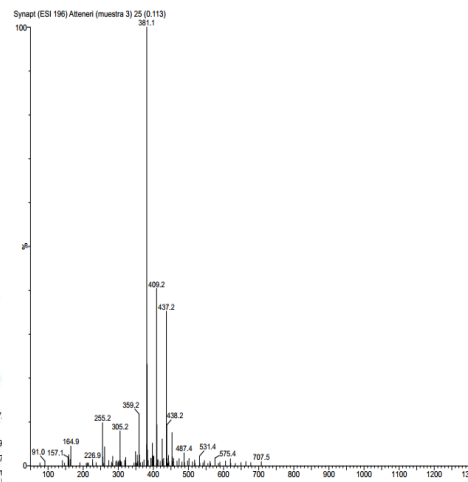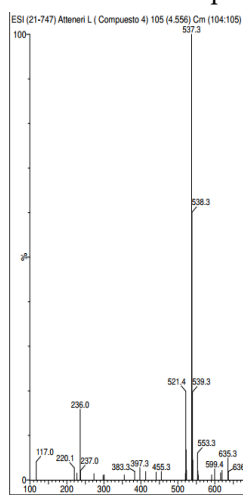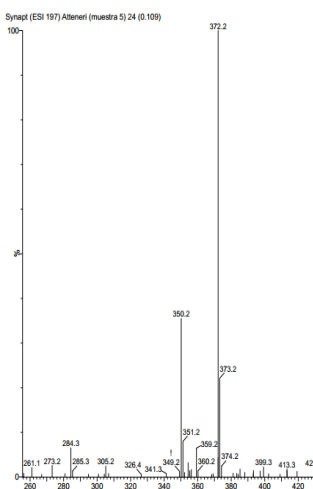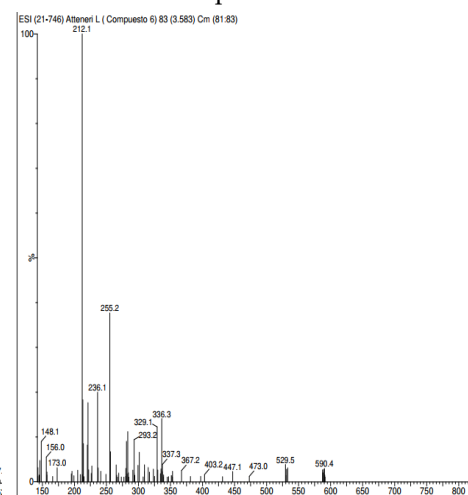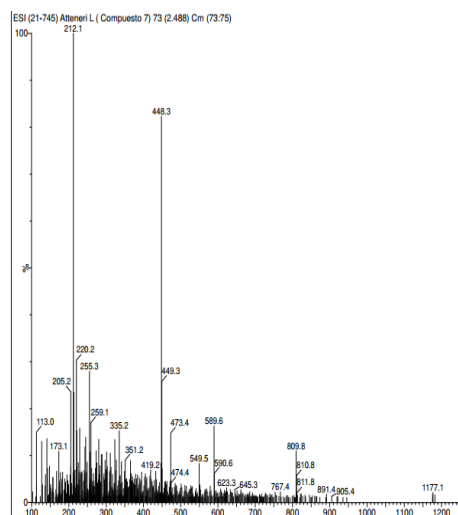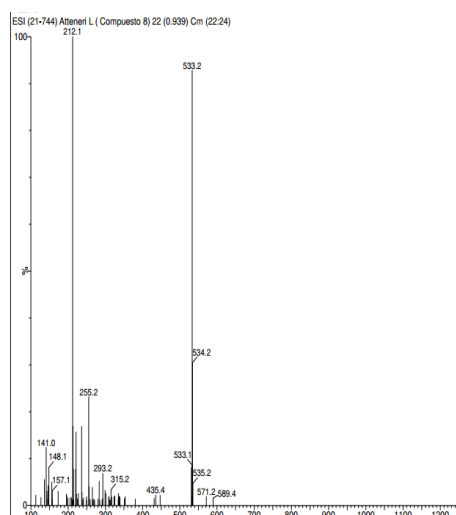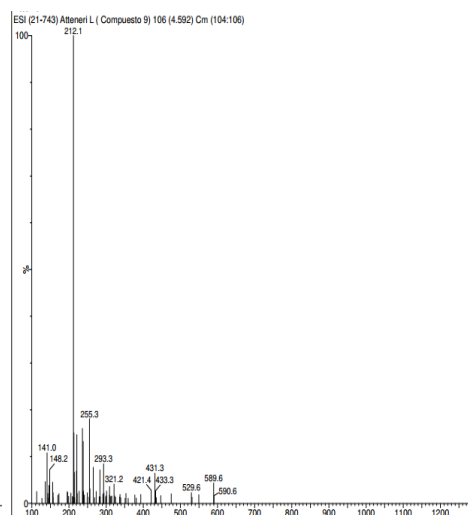

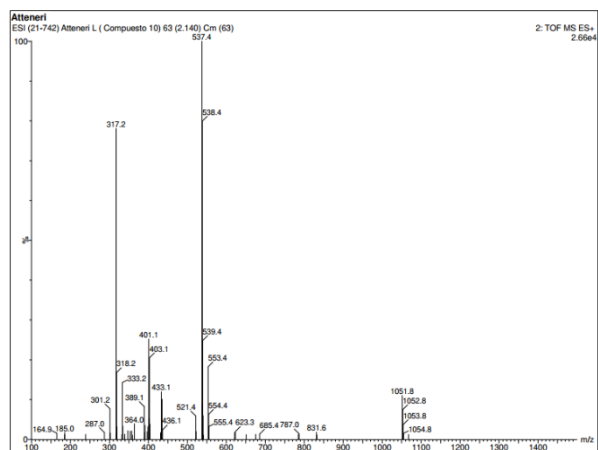

Compound 10

Scheme S2. MS spectra of the 10 selected compounds.
